# Supplementary material
Source: publisher figshare collection journal article supplement (https://acs.figshare.com/ndownloader/files/3880798)
Supplement: Supplementary file 1 [file 3880798]

# Electro-active Organic Dye Incorporating Dipeptides in the Formation of Self-assembled Nanofibrous Hydrogels

Yu-Hao Liu, Shu-Min Hsu, Fang-Yi Wu, Hsun Cheng, Mei-Yu Yeh and  
Hsin-Chieh Lin\*

Department of Materials Science and Engineering, National Chiao Tung  
University, Hsinchu, Taiwan, Republic of China 300  
hclin45@nctu.edu.tw

## Supporting Information

| Contents                                                                       | Page Number |
|--------------------------------------------------------------------------------|-------------|
| 1. Synthetic details and characterization data for <b>2-4</b>                  | 02          |
| 2. <sup>1</sup> H-NMR spectra of <b>1-4</b>                                    | 06          |
| 3. FT-IR spectra of <b>1-4</b> at acidic conditions                            | 08          |
| 4. CD and UV-vis absorption spectra of <b>1-4</b> at acidic conditions         | 08          |
| 5. Fluorescence emission spectra of <b>1-4</b> at acidic conditions            | 10          |
| 6. Fluorescence images of MCF-7 cells for <b>3</b> and <b>4</b>                | 11          |
| 7. Time dependent fluorescence images of MCF-7 cells for <b>1</b> and <b>2</b> | 12          |
| 8. Table of physical properties of <b>1-4</b> under acidic conditions          | 14          |

**Synthesis of NDI-Phe-Gly (2).** The peptide/dye conjugate derivative of **2** was prepared through SPPS using 2-chlorotrityl chloride resin, Fmoc-L-phenylalanine, Fmoc-L-glycine and NDIA (Figure 1).<sup>57</sup> The resin (1.2 g) was swelled in anhydrous CH<sub>2</sub>Cl<sub>2</sub> for 30 min and then Fmoc-L-glycine (0.595 g, 2.000 mmol) was loaded onto the resin in anhydrous *N,N*-dimethylformamide and *N,N*-diisopropylethylamine (DIEA; 0.830 mL, 5.000 mmol) for 1 h. For deprotection of the Fmoc group, piperidine (20% in DMF) was added and the sample left for 20 min; this procedure was repeated twice (each time for 2 min). Fmoc-L-phenylalanine (0.775 g, 2.000 mmol) was coupled to the free amino group using *O*-(benzotriazol-1-yl)-*N,N,N',N'*-tetramethyluroniumhexafluorophosphate (HBTU) (0.3793 g, 1.000 mmol) and *N,N*-diisopropylethylamine (DIEA) (0.4150 mL, 2.500 mmol) as coupling agents for 30 min. Again, the sample was treated with piperidine (20% in DMF) for 20 min; this procedure was repeated twice (each time for 2 min). Finally, NDIA (0.873 g, 2.000 mmol) was coupled to the free amino group using HBTU (0.7586 g, 2.000 mmol) and DIEA (0.830 mL, 5.000 mmol) as coupling agents. After the reaction mixture had been stirred overnight, the peptide derivative was cleaved through treatment with CF<sub>3</sub>CO<sub>2</sub>H (90% in DI water) for 3 h. The resulting solution was dried by air and then Et<sub>2</sub>O was added to precipitate the target product. The solid was dried under vacuum to remove residual solvent (light-brown solid:

0.236 g).  $^1\text{H}$  NMR (300 MHz,  $[\text{D}_6]\text{DMSO}$ , 25 °C):  $\delta$ =0.80-0.95 (m, 3H;  $\text{CH}_3$ ), 1.20-1.45 (m, 10H;  $\text{CH}_2$ ), 1.60-1.75 (m, 2H;  $\text{CH}_2$ ), 2.70-2.90 (m, 1H;  $\text{CH}_2$ ), 3.00-3.15 (m, 1H;  $\text{CH}_2$ ), 3.80-3.85 (m, 2H;  $\text{CH}_2$ ), 4.09 (t,  $J$ =7.35 Hz, 2H;  $\text{CH}_2$ ), 4.55-4.70 (m, 1H; CH), 4.72 (s, 2H;  $\text{CH}_2$ ), 7.20-7.40 (m, 5H; CH), 8.40-8.50 (m, 1H; NH), 8.63 (d,  $J$ =8.4 Hz, 1H; NH), 8.70-8.80 (m, 4H; CH);  $^{13}\text{C}$  NMR (75 MHz,  $[\text{D}_6]\text{DMSO}$ , 25 °C):  $\delta$ =14.0, 22.1, 26.5, 27.4, 28.6, 28.7, 31.2, 37.8, 40.7, 42.5, 53.9, 125.9, 126.3, 126.7, 128.1, 129.3, 130.4, 130.7, 137.7, 162.4, 162.6, 166.2, 171.1, 171.3; MS  $[\text{FAB}^-]$ : calcd.  $m/z$  640.25, obsvd. 640.0  $[\text{M} - \text{H}]^-$ .

**Synthesis of NDI-Gly-Phe (3).** The peptide/dye conjugate derivative of **3** was prepared through SPPS using 2-chlorotrityl chloride resin, Fmoc-L-phenylalanine, Fmoc-L-glycine and NDIA (Figure 1).<sup>57</sup> The resin (1.2 g) was swelled in anhydrous  $\text{CH}_2\text{Cl}_2$  for 30 min and then Fmoc-L-phenylalanine (0.775 g, 2.000 mmol) was loaded onto the resin in anhydrous  $N,N$ -dimethylformamide and  $N,N$ -diisopropylethylamine (DIEA; 0.830 mL, 5.000 mmol) for 1 h. For deprotection of the Fmoc group, piperidine (20% in DMF) was added and the sample left for 20 min; this procedure was repeated twice (each time for 2 min). Fmoc-L-glycine (0.595 g, 2.000 mmol) was coupled to the free amino group using  $O$ -(benzotriazol-1-yl)- $N,N,N',N'$ -tetramethyluroniumhexafluorophosphate (HBTU) (0.3793 g, 1.000 mmol) and  $N,N$ -diisopropylethylamine (DIEA) (0.4150 mL, 2.500

mmol) as coupling agents for 30 min. Again, the sample was treated with piperidine (20% in DMF) for 20 min; this procedure was repeated twice (each time for 2 min). Finally, NDIA (0.873 g, 2.000 mmol) was coupled to the free amino group using HBTU (0.7586 g, 2.000 mmol) and DIEA (0.830 mL, 5.000 mmol) as coupling agents. After the reaction mixture had been stirred overnight, the peptide derivative was cleaved through treatment with  $\text{CF}_3\text{CO}_2\text{H}$  (90% in DI water) for 3 h. The resulting solution was dried by air and then  $\text{Et}_2\text{O}$  was added to precipitate the target product. The solid was dried under vacuum to remove residual solvent (light-brown solid: 0.277 g).  $^1\text{H}$  NMR (300 MHz,  $[\text{D}_6]\text{DMSO}$ , 25 °C):  $\delta$ =0.85-1.00 (m, 3H;  $\text{CH}_3$ ), 1.20-1.50 (m, 10H;  $\text{CH}_2$ ), 1.65-1.80 (m, 2H;  $\text{CH}_2$ ), 2.85-3.05 (m, 1H;  $\text{CH}_2$ ), 3.05-3.20 (m, 1H;  $\text{CH}_2$ ), 3.65-3.95 (m, 2H;  $\text{CH}_2$ ), 4.09 (t,  $J$ =7.35 Hz, 2H;  $\text{CH}_2$ ), 4.40-4.55 (m, 1H; CH), 4.77 (s, 2H;  $\text{CH}_2$ ), 7.20-7.40 (m, 5H; CH), 8.22 (d,  $J$ =7.8 Hz, 1H; NH), 8.55-8.65 (m, 1H; NH), 8.70-8.85 (m, 4H; CH);  $^{13}\text{C}$  NMR (75 MHz,  $[\text{D}_6]\text{DMSO}$ , 25 °C):  $\delta$ =13.9, 22.1, 26.5, 27.3, 28.7, 31.2, 36.8, 41.6, 42.5, 53.5, 125.9, 126.16, 126.19, 126.4, 126.6, 128.2, 129.1, 130.4, 130.6, 137.4, 162.45, 162.54, 166.6, 168.4, 172.7; MS  $[\text{FAB}^-]$ : calcd.  $m/z$  640.25, obsvd. 639.8  $[\text{M} - \text{H}]^-$ .

**Synthesis of NDI-Gly-Gly (4).** The peptide/dye conjugate derivative of **4** was prepared through SPPS using 2-chlorotrityl chloride resin, Fmoc-L-glycine and NDIA (Figure 1).<sup>57</sup> The resin (1.2 g) was swelled in anhydrous  $\text{CH}_2\text{Cl}_2$  for 30 min and then

Fmoc- L-glycine (0.595 g, 2.000 mmol) was loaded onto the resin in anhydrous *N,N*-dimethylformamide and *N,N*-diisopropylethylamine (DIEA; 0.830 mL, 5.000 mmol) for 1 h. For deprotection of the Fmoc group, piperidine (20% in DMF) was added and the sample left for 20 min; this procedure was repeated twice (each time for 2 min). Fmoc- L-glycine (0.595 g, 2.000 mmol) was coupled to the free amino group using *O*-(benzotriazol-1-yl)-*N,N,N',N'*-tetramethyluraniuhexafluorophosphate (HBTU) (0.3793 g, 1.000 mmol) and *N,N*-diisopropylethylamine (DIEA) (0.4150 mL, 2.500 mmol) as coupling agents for 30 min. Again, the sample was treated with piperidine (20% in DMF) for 20 min; this procedure was repeated twice (each time for 2 min). Finally, NDIA (0.873 g, 2.000 mmol) was coupled to the free amino group using HBTU (0.7586 g, 2.000 mmol) and DIEA (0.830 mL, 5.000 mmol) as coupling agents. After the reaction mixture had been stirred overnight, the peptide derivative was cleaved through treatment with CF<sub>3</sub>CO<sub>2</sub>H (90% in DI water) for 3 h. The resulting solution was dried by air and then Et<sub>2</sub>O was added to precipitate the target product. The solid was dried under vacuum to remove residual solvent (brown solid: 0.273 g).

<sup>1</sup>H NMR (300 MHz, [D<sub>6</sub>]DMSO, 25 °C): δ=0.85-0.95 (m, 3H; CH<sub>3</sub>), 1.20-1.45 (m, 10H; CH<sub>2</sub>), 1.65-1.80 (m, 2H; CH<sub>2</sub>), 3.80-3.90 (m, 4H; CH<sub>2</sub>), 4.09 (m, J=7.5 Hz, 2H; CH<sub>2</sub>), 4.80 (s, 2H; CH<sub>2</sub>), 8.20-8.30 (m, 1H; NH), 8.60-8.70 (m, 1H; NH), 8.70-8.80

(m, 4H; CH);  $^{13}\text{C}$  NMR (75 MHz,  $[\text{D}_6]\text{DMSO}$ , 25  $^\circ\text{C}$ ):  $\delta$ =14.9, 23.0, 27.5, 28.3, 29.5, 29.6, 31.6, 32.2, 41.5, 42.7, 43.6, 126.8, 127.08, 127.14, 127.2, 127.5, 131.4, 131.6, 163.4, 163.5, 167.7, 169.9, 172.1; MS  $[\text{FAB}^-]$ : calcd.  $m/z$  550.21, obsvd. 549.5  $[\text{M} - \text{H}]^-$ .

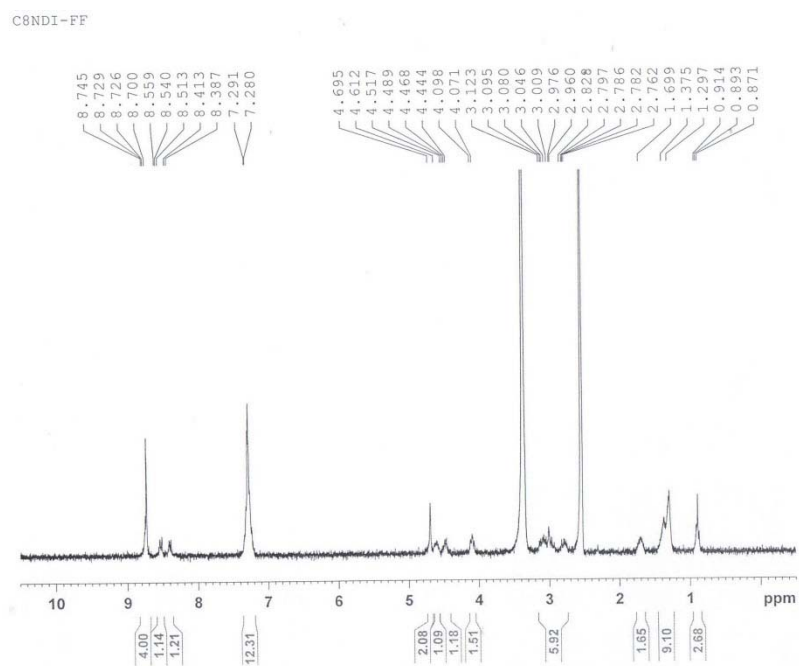

Fig. S1.  $^1\text{H}$  NMR spectra of **1** in  $[\text{D}_6]\text{DMSO}$ .

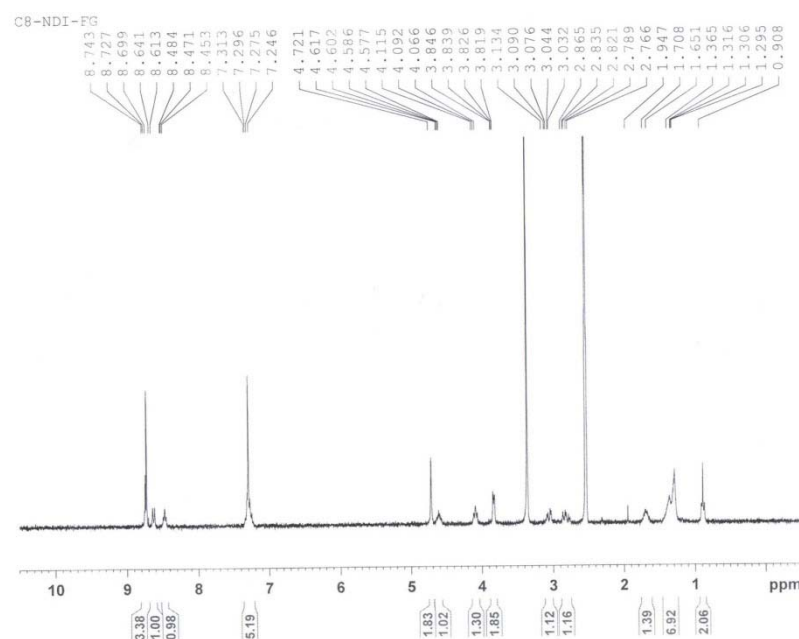

Fig. S2.  $^1\text{H}$  NMR spectra of **2** in  $[\text{D}_6]\text{DMSO}$ .

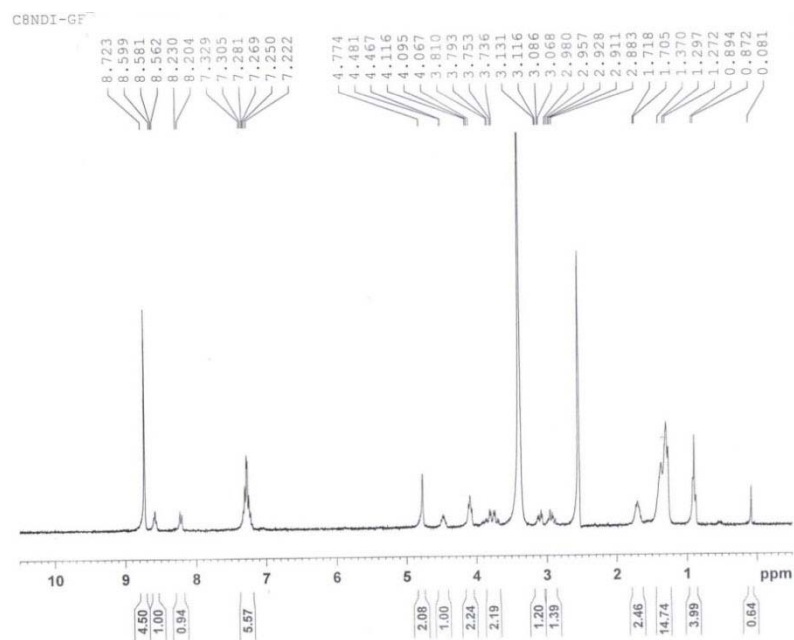

Fig. S3.  $^1\text{H}$  NMR spectra of **3** in  $[\text{D}_6]\text{DMSO}$ .

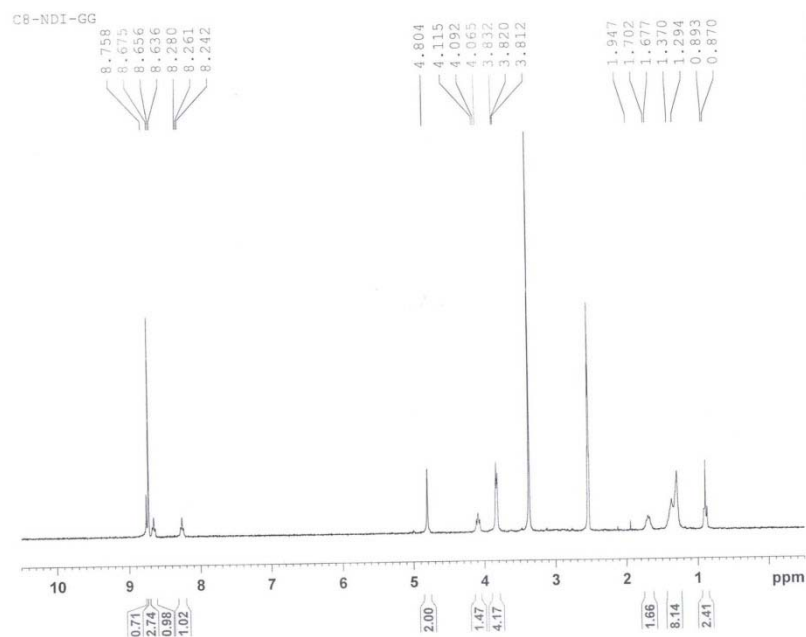

Fig. S4.  $^1\text{H}$  NMR spectra of **4** in  $[\text{D}_6]\text{DMSO}$ .

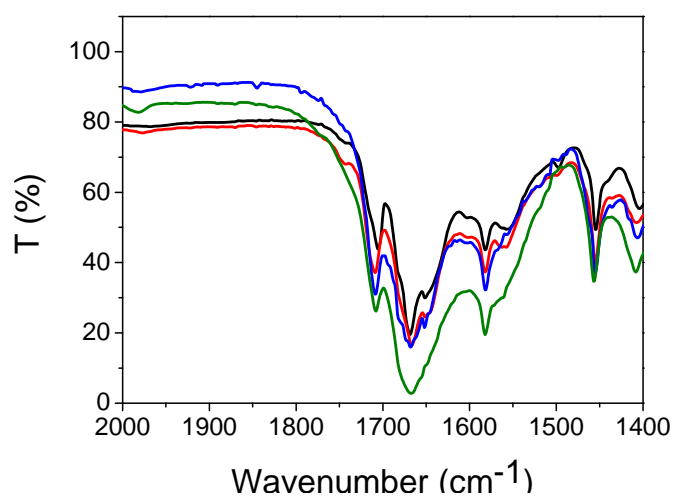

Fig. S5. FT-IR spectra of the hydrogels of **1** (black), **2** (red), **3** (blue) and **4** (green).

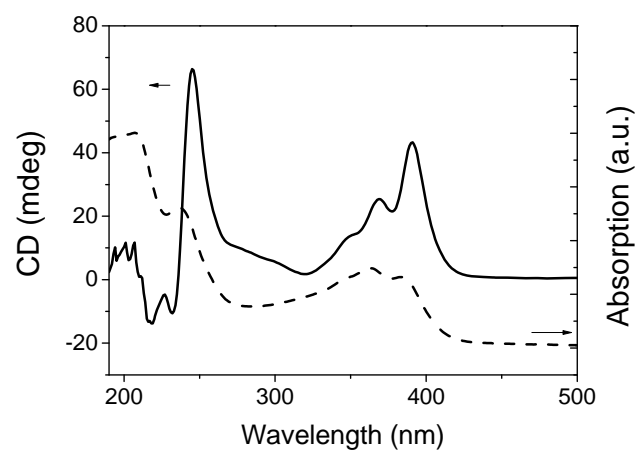

Fig. S6. CD (solid line) and UV-vis absorption (dashed line) spectra of **1** at 0.1 wt% solution (pH 4.8).

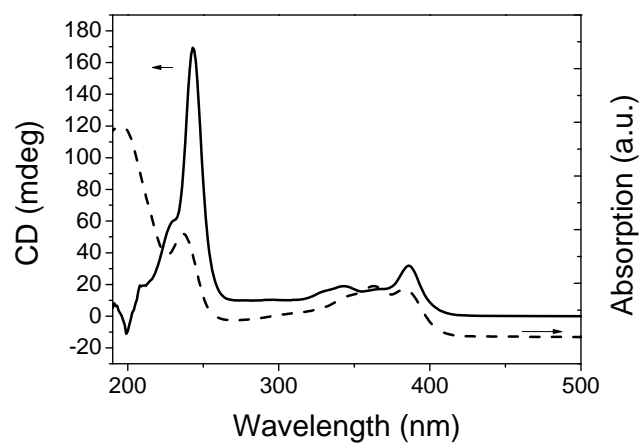



Fig. S7. CD (solid line) and UV-vis absorption (dashed line) spectra of **2** at 0.1 wt% solution (pH 4.7).

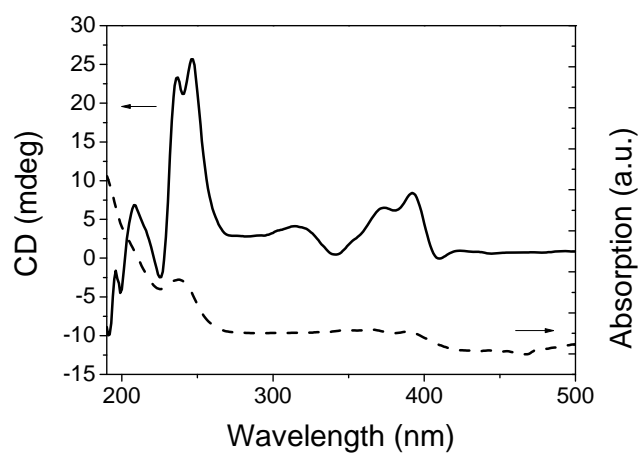

Fig. S8. CD (solid line) and UV-vis absorption (dashed line) spectra of **3** at 0.1 wt% solution (pH 4.3).

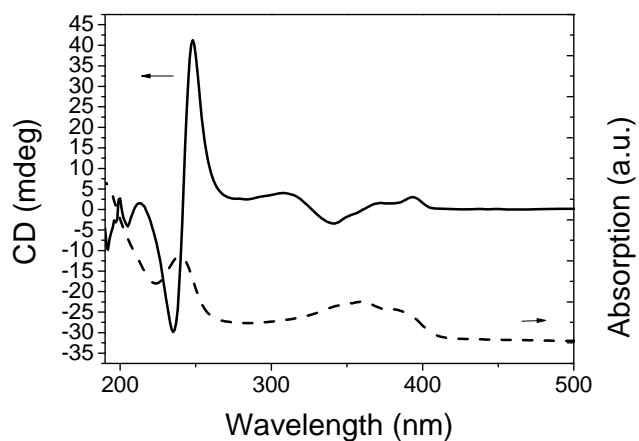

Fig. S9. CD (solid line) and UV-vis absorption (dashed line) spectra of **4** at 0.1 wt% solution (pH 3.8).

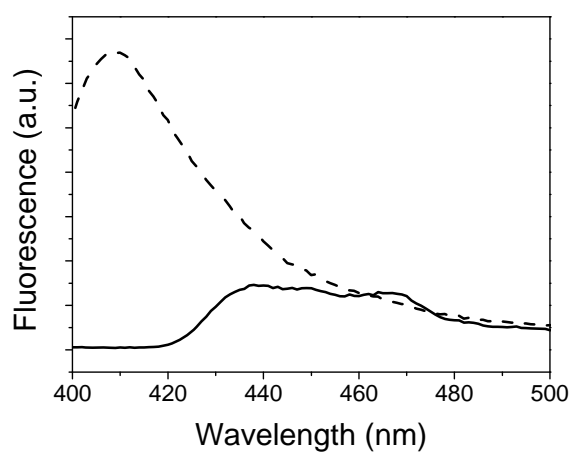

Fig. S10. Fluorescence emission spectra of **1** at 2 wt % gel (solid line) and 0.05 wt% solution (dashed line) (pH 4.8).

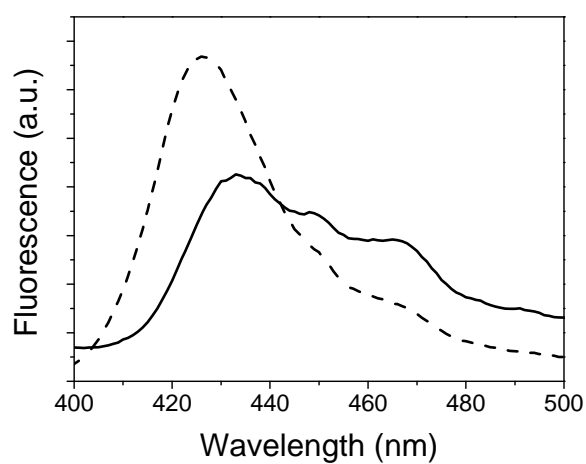

Fig. S11. Fluorescence emission spectra of **3** at 2 wt % gel (solid line) and 0.05 wt% solution (dashed line) (pH 4.3).

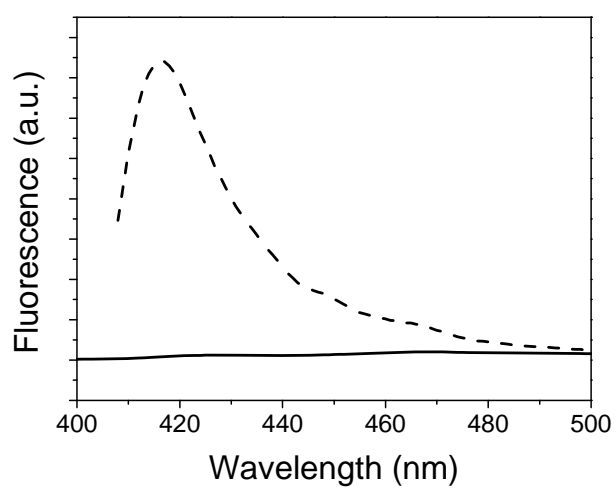

Fig. S12. Fluorescence emission spectra of **4** at 2 wt % gel (solid line) and 0.05 wt% solution (dashed line) (pH 3.8).

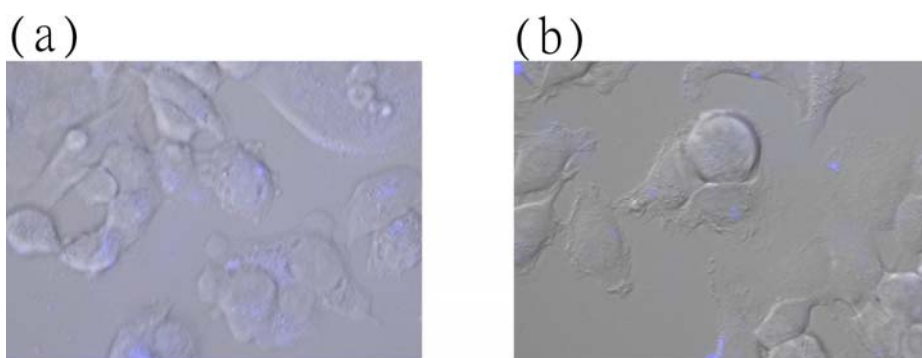

Fig. S13. Fluorescence images of MCF-7 cells incubated with 50  $\mu$ M of (a) **3**, (b) **4** after 1.5 h.

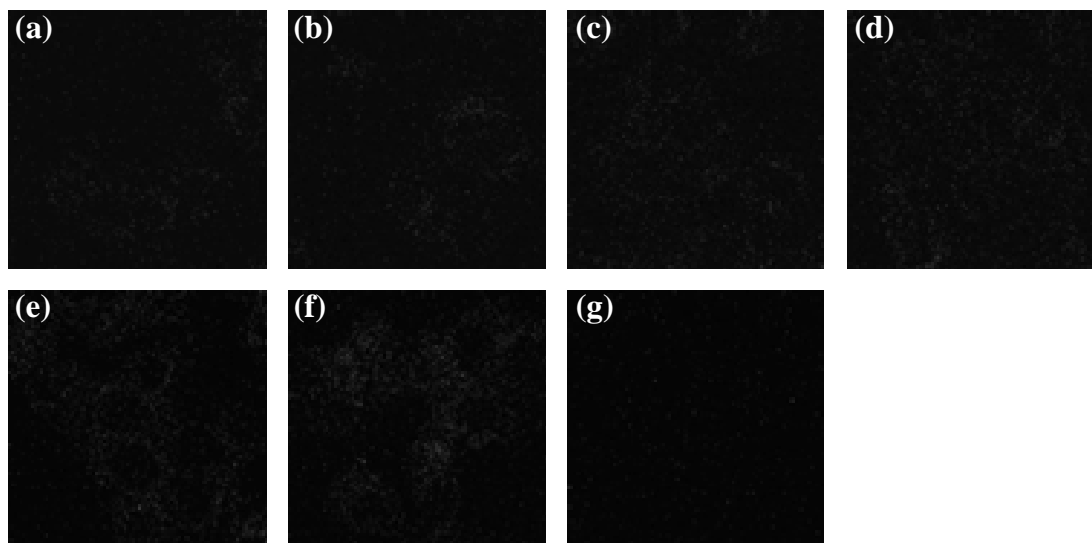

Figure S14. Time dependent fluorescence images of MCF-7 cells incubated with 25  $\mu$ M of **1**. Time points (a) 1 min, (b) 5 min, (c) 10 min, (d) 30 min, (e) 120 min, (f) 180 min, (g) control.

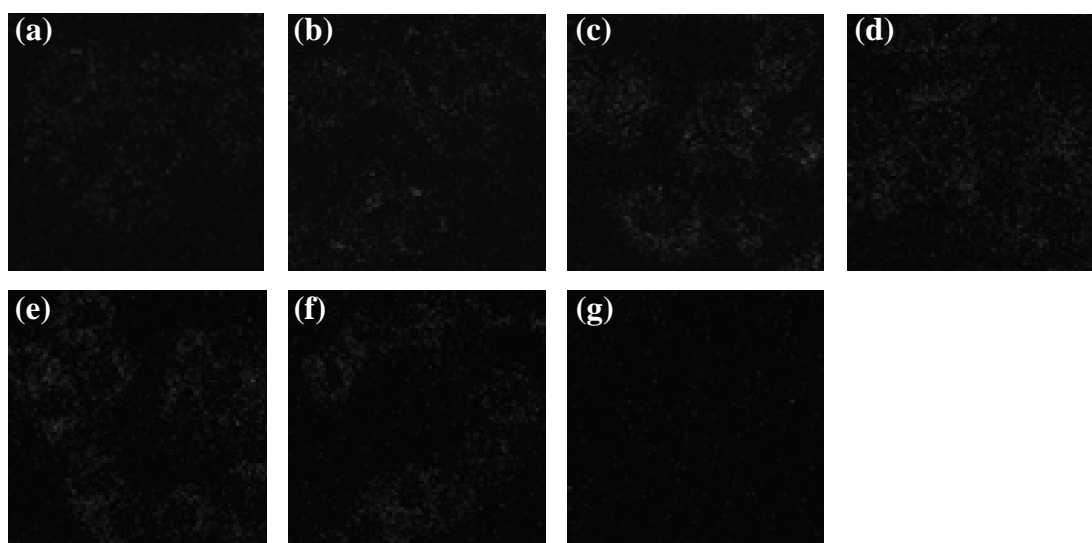

Figure S15. Time dependent fluorescence images of MCF-7 cells incubated with 50  $\mu$ M of **1**. Time points (a) 1 min, (b) 5 min, (c) 10 min, (d) 30 min, (e) 120 min, (f) 180 min, (g) control.

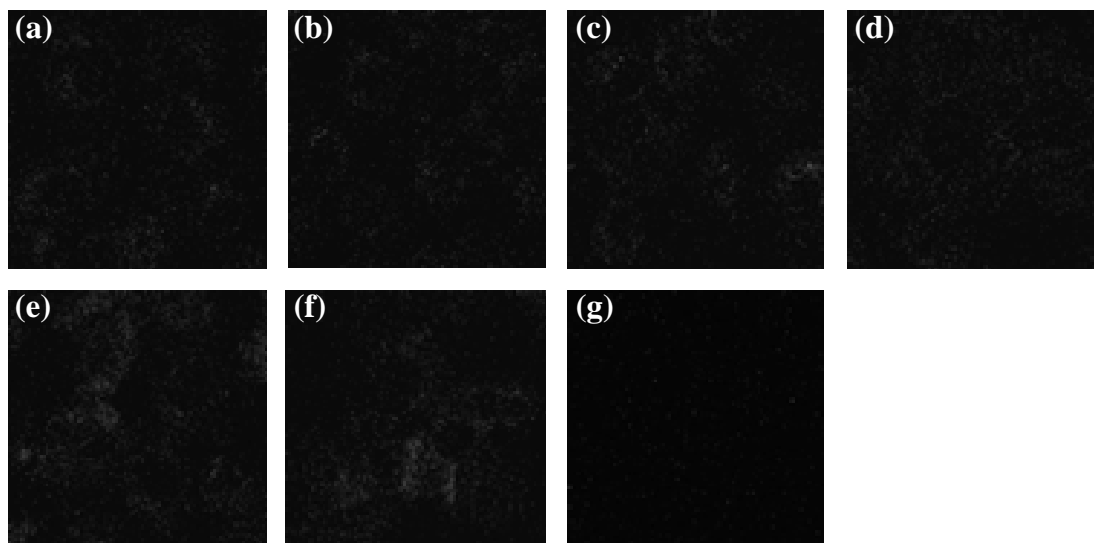

Figure S16. Time dependent fluorescence images of MCF-7 cells incubated with 25  $\mu\text{M}$  of **2**. Time points (a) 1 min, (b) 5 min, (c) 10 min, (d) 30 min, (e) 120 min, (f) 180 min, (g) control.

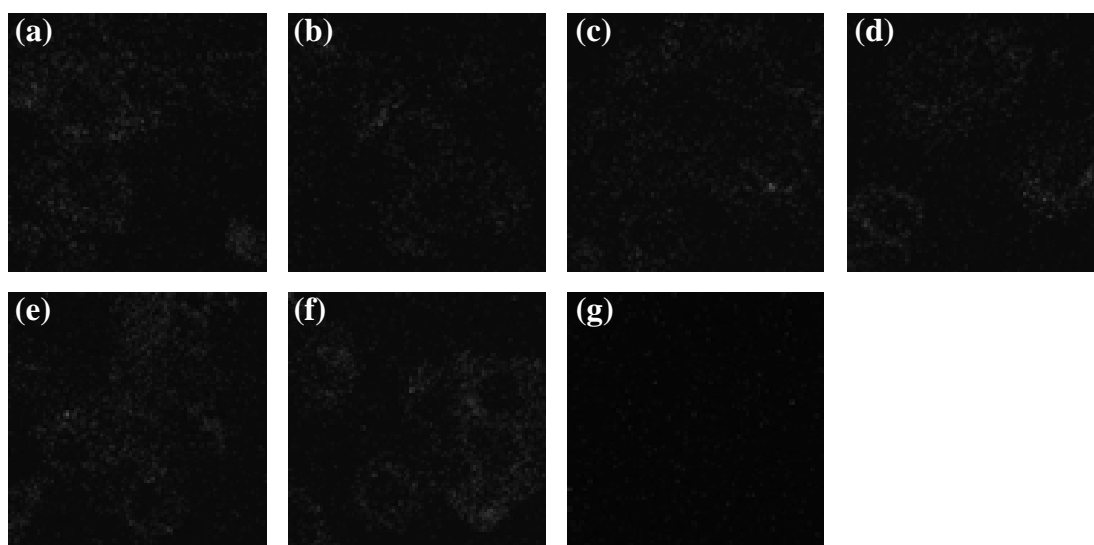

Figure S17. Time dependent fluorescence images of MCF-7 cells incubated with 50  $\mu\text{M}$  of **2**. Time points (a) 1 min, (b) 5 min, (c) 10 min, (d) 30 min, (e) 120 min, (f) 180 min, (g) control.

**Table S1. Physical properties of NDI-capped dipeptides under acidic conditions.**

| Entry | pH  | Appearance <sup>a</sup> | G', G''<br>(Pa)                              | Fiber diameter<br>(nm) |
|-------|-----|-------------------------|----------------------------------------------|------------------------|
| 1     | 4.8 | OG                      | 1.8x10 <sup>4</sup> ,<br>1.5x10 <sup>3</sup> | 9±1                    |
| 2     | 4.7 | SG                      | 1.3x10 <sup>4</sup> ,<br>1.4x10 <sup>3</sup> | 9±1                    |
| 3     | 4.3 | OG                      | 1.1x10 <sup>4</sup> ,<br>9.5x10 <sup>2</sup> | 9±1                    |
| 4     | 3.8 | OG                      | 1.7x10 <sup>3</sup> ,<br>1.7x10 <sup>2</sup> | 11±1                   |

<sup>a</sup>OG: opaque gel; SG: semi-translucent gel. All hydrogels were prepared at 2 wt%.
